# Supplementary material
Source: publisher site journal article supplement (https://static.cambridge.org/content/id/urn:cambridge.org:id:article:S0022109020000241/resource/name/S0022109020000241supp001.pdf)
Supplement: Supplementary file 1 [file S0022109020000241supp001.pdf]

# **Online Appendix**

## **Debtholder Monitoring Incentives and Bank Earnings Opacity**

Not for Publication

## **Appendix A: Details for the introduction of state depositor preference laws**

### **A.1 List of keywords - search strategy for motivation behind state depositor preference laws**

The following list of keywords is used in Lexis/Nexis, Factiva, American Banker, Journal State Legislatures, and Business Source Complete.

*priority for bank deposits, priority for depositors, depositor priority, depositor preference, priority claim, creditor ranking, bank liquidation, bank failure, liquidation of bank, claim structure for deposits, ranking of depositors, deposit obligation, depositor obligation, claims of depositors, claim structure, priority of claims liquidation priority, liquidation regime, claims to be paid before those of general creditors, pari passu with general creditors, market discipline, enforcement actions, deposit rank, depositor rank, Omnibus Reconciliation Act, earnings opacity, opacity, transparency, opaque.*

Our keyword search is constrained to the 12 months prior to the day of the introduction of state depositor preference.

**Appendix B: Additional Results and Robustness Tests**

**Table B.1  
Charter Switching**

| <b>Panel A: Determinants of charter switching</b>   |                       |                       |                       |                       |
|-----------------------------------------------------|-----------------------|-----------------------|-----------------------|-----------------------|
| Dependent variable                                  | (1)                   | (2)                   | (3)                   | (4)                   |
|                                                     | Charter switch        | Charter switch        | Charter switch        | Charter switch        |
| Post                                                | 0.0010<br>(1.62)      | 0.0010<br>(1.62)      | 0.0010<br>(1.62)      | 0.0010<br>(1.62)      |
| LLP <sub>t-1</sub>                                  | -0.0000<br>(-0.05)    | -0.0000<br>(-0.05)    | -0.0000<br>(-0.05)    | -0.0000<br>(-0.05)    |
| Bank size                                           | 0.0005<br>(1.08)      | 0.0005<br>(1.08)      | 0.0005<br>(1.08)      | 0.0005<br>(1.08)      |
| Capital ratio                                       | 0.0002<br>(1.73)      | 0.0002<br>(1.73)      | 0.0003<br>(1.74)      | 0.0003<br>(1.74)      |
| Loss                                                | 0.0007*<br>(1.87)     | 0.0007*<br>(1.88)     | 0.0007*<br>(1.87)     | 0.0007*<br>(1.87)     |
| EO <sup>1</sup>                                     | 0.0000<br>(0.31)      |                       |                       |                       |
| EO <sup>2</sup>                                     |                       | 0.0000<br>(0.32)      |                       |                       |
| EO <sup>3</sup>                                     |                       |                       | 0.0000<br>(0.39)      |                       |
| EO <sup>4</sup>                                     |                       |                       |                       | 0.0000<br>(0.40)      |
| State FE                                            | Yes                   | Yes                   | Yes                   | Yes                   |
| Quarter FE                                          | Yes                   | Yes                   | Yes                   | Yes                   |
| Bank FE                                             | Yes                   | Yes                   | Yes                   | Yes                   |
| Observations                                        | 205,057               | 205,057               | 205,057               | 205,057               |
| R <sup>2</sup>                                      | 0.0401                | 0.0401                | 0.0401                | 0.0401                |
| <b>Panel B: Excluding banks that switch charter</b> |                       |                       |                       |                       |
| Dependent variable                                  | EO <sup>1</sup>       | EO <sup>2</sup>       | EO <sup>3</sup>       | EO <sup>4</sup>       |
| TG * Post                                           | -0.0737***<br>(-3.79) | -0.0764***<br>(-3.86) | -0.0755***<br>(-3.89) | -0.0761***<br>(-3.92) |
| LLP <sub>t-1</sub>                                  | 0.2916***<br>(6.47)   | 0.2489***<br>(4.10)   | 0.2760***<br>(8.71)   | 0.2334***<br>(6.72)   |
| Bank size                                           | 0.0178<br>(1.06)      | 0.0101<br>(0.60)      | 0.0058<br>(0.34)      | 0.0098<br>(0.59)      |
| Capital ratio                                       | -0.0919***<br>(-4.33) | -0.0931***<br>(-4.39) | -0.0922***<br>(-4.25) | -0.0928***<br>(-4.33) |
| Loss                                                | 0.7565***<br>(24.75)  | 0.7576***<br>(24.76)  | 0.7573***<br>(23.86)  | 0.7583***<br>(24.09)  |
| State * Quarter FE                                  | Yes                   | Yes                   | Yes                   | Yes                   |
| Bank FE                                             | Yes                   | Yes                   | Yes                   | Yes                   |
| Observations                                        | 197,681               | 197,681               | 197,681               | 197,681               |
| R <sup>2</sup>                                      | 0.2215                | 0.2246                | 0.2263                | 0.2257                |

Notes: Panel A reports estimates of equation  $s_{bst} = \beta Post_{st} + \gamma X_{bst} + EO_{bst}^j + \delta_b + \delta_s + \delta_t + \varepsilon_{bst}$ , where  $s_{bst}$  is a dummy variable equal to 1 if bank  $b$  in state  $s$  switches charter during quarter  $t$ , 0 otherwise;  $Post_{st}$  is a dummy variable equal to 1 if depositor preference is present in state  $s$  during quarter  $t$ ;  $X_{bst}$  is a vector containing the variables LLP<sub>t-1</sub>, Bank size, Capital ratio, the Loss dummy,  $\delta_b$ ,  $\delta_s$  and  $\delta_t$  denote bank-, state- and quarter-fixed effects, respectively;  $\varepsilon_{bst}$  is the error term.  $EO_{bst}^j$  denotes one of the earnings opacity measures,  $EO^1$ ,  $EO^2$ ,  $EO^3$  and  $EO^4$ . Panel B reports estimates of equation (6) using a sample that excludes banks that switch charter during the sample period. The TG dummy is omitted in this equation because it is captured by the bank-fixed effect. Standard errors are clustered at the state level and the corresponding heteroscedasticity-robust  $t$ -statistics are reported in parentheses. \*\*\* and \* indicate statistical significance at the 1 and 10 percent levels, respectively.

**Table B.2**  
**Alternative test for parallel trends**

| Time    | $EO^1$              |                     |                    |                | $EO^2$              |                     |                     |                | $EO^3$              |                     |                     |                | $EO^4$              |                     |                     |                |
|---------|---------------------|---------------------|--------------------|----------------|---------------------|---------------------|---------------------|----------------|---------------------|---------------------|---------------------|----------------|---------------------|---------------------|---------------------|----------------|
|         | State Charter       | National Charter    | Difference         | $t$ -statistic | State Charter       | National Charter    | Difference          | $t$ -statistic | State Charter       | National Charter    | Difference          | $t$ -statistic | State Charter       | National Charter    | Difference          | $t$ -statistic |
| $t - 1$ | -6.2245<br>(0.0863) | -6.2180<br>(0.0789) | 0.0065<br>(0.1169) | 0.06           | -6.2354<br>(0.0934) | -6.2923<br>(0.0804) | -0.0569<br>(0.1241) | -0.46          | -6.2301<br>(0.0920) | -6.2969<br>(0.0747) | -0.0667<br>(0.1195) | -0.56          | -6.2253<br>(0.0911) | -6.3012<br>(0.0736) | -0.0759<br>(0.1181) | -0.64          |
| $t - 2$ | -6.2131<br>(0.0665) | -6.1571<br>(0.0614) | 0.0560<br>(0.0904) | 0.62           | -6.1560<br>(0.1056) | -6.1392<br>(0.0938) | 0.0168<br>(0.1420)  | 0.12           | -6.2193<br>(0.1388) | -6.1557<br>(0.0935) | 0.0636<br>(0.1698)  | 0.37           | -6.1843<br>(0.1126) | -6.1501<br>(0.0922) | 0.0341<br>(0.1468)  | 0.24           |
| $t - 3$ | -6.1900<br>(0.0607) | -6.1240<br>(0.0499) | 0.0659<br>(0.0788) | 0.84           | -6.1694<br>(0.1527) | -6.0955<br>(0.0899) | 0.0739<br>(0.1807)  | 0.41           | -6.1555<br>(0.1391) | -6.0974<br>(0.0893) | 0.0581<br>(0.1682)  | 0.35           | -6.1526<br>(0.1357) | -6.0960<br>(0.0896) | 0.0566<br>(0.1653)  | 0.34           |
| $t - 4$ | -6.1840<br>(0.0510) | -6.1342<br>(0.0489) | 0.0498<br>(0.0716) | 0.70           | -6.1852<br>(0.0991) | -6.1874<br>(0.1548) | -0.0022<br>(0.1757) | -0.01          | -6.1755<br>(0.0957) | -6.1972<br>(0.1568) | -0.0216<br>(0.1743) | -0.12          | -6.1857<br>(0.0983) | -6.1895<br>(0.1555) | -0.0038<br>(0.1754) | -0.02          |

*Notes:* We present tests for parallel trends based on  $t$ -tests as suggested by Lemmon and Roberts (2010) and Roberts and Whited (2013). Definitions of the variables are provided in Panel A of Table 2. The  $t$ -tests examine the equality of the growth rate of the earnings opacity variables in the pre-treatment periods  $t-1$ ,  $t-2$ ,  $t-3$ , and  $t-4$  between the treatment and control groups.

**Table B.3**  
**Further effects of nondepositors' monitoring incentives**

| Dependent variable | (1)<br>Collateralization | (2)<br>ND maturity structure | (3)<br>Distance to regulator office | (4)<br>Loans past due |
|--------------------|--------------------------|------------------------------|-------------------------------------|-----------------------|
| TG                 | 0.0359<br>(0.84)         | -0.3586<br>(-1.08)           | -0.7904**<br>(-2.26)                | 0.1359<br>(1.69)      |
| TG * Post          | 0.0642**<br>(2.23)       | 0.7446***<br>(3.08)          | 0.0105<br>(0.70)                    | -0.1402*<br>(-1.97)   |
| LLP <sub>t-1</sub> | -0.5302***<br>(-8.52)    | 0.0861<br>(0.45)             | 0.0024<br>(0.26)                    | 0.0732<br>(1.22)      |
| Bank size          | 0.1080<br>(1.59)         | 0.4469***<br>(3.58)          | -0.0090<br>(-1.65)                  | 0.2853***<br>(3.78)   |
| Capital ratio      | -0.0097<br>(-0.67)       | 0.1850***<br>(3.56)          | 0.0015<br>(0.38)                    | -0.1343*<br>(-2.14)   |
| Loss               | 0.0643***<br>(4.45)      | -0.2198***<br>(-4.37)        | -0.0031<br>(-1.73)                  | 0.2795***<br>(11.00)  |
| State * Quarter FE | Yes                      | Yes                          | Yes                                 | Yes                   |
| Bank FE            | Yes                      | Yes                          | Yes                                 | Yes                   |
| Observations       | 205,057                  | 205,057                      | 205,057                             | 205,057               |
| R <sup>2</sup>     | 0.4116                   | 0.4439                       | 0.9964                              | 0.3848                |

*Notes:* This table reports estimates of equation (6) using collateralization, nondeposit maturity structure, the distance to the regulator office, and loans past due (30-89 days) to total loans as the dependent variable. Definitions of the variables are provided in Panel A of Table 2. The sample is restricted to banks in states that enacted depositor preference over the period 1983Q1 to 1993Q2. The standard errors are clustered at the state level and the corresponding heteroscedasticity-robust *t*-statistics are reported in parentheses. \*\*\*, \*\* and \* indicate statistical significance at the 1, 5 and 10 percent levels, respectively.

**Table B.4**

**Effects of increases in nondepositors' monitoring incentives during crises and non crisis periods**

| <b>Panel A: Regional banking crises (New England and Texas)</b> |                       |                       |                       |                       |                       |                       |                       |                       |
|-----------------------------------------------------------------|-----------------------|-----------------------|-----------------------|-----------------------|-----------------------|-----------------------|-----------------------|-----------------------|
| Dependent variable                                              | (1)<br>$EO^1$         | (2)<br>$EO^1$         | (3)<br>$EO^2$         | (4)<br>$EO^2$         | (5)<br>$EO^3$         | (6)<br>$EO^3$         | (7)<br>$EO^4$         | (8)<br>$EO^4$         |
| Sample split                                                    | Non Crisis            | Crisis                |
| TG                                                              | -0.0055<br>(-0.21)    | 0.1368<br>(1.30)      | -0.0015<br>(-0.06)    | 0.1257<br>(1.20)      | -0.0035<br>(-0.13)    | 0.1456<br>(1.38)      | -0.0048<br>(-0.18)    | 0.1588<br>(1.51)      |
| TG * Post                                                       | -0.0639***<br>(-5.79) | -0.4008***<br>(-4.54) | -0.0672***<br>(-6.10) | -0.3611***<br>(-4.10) | -0.0652***<br>(-5.89) | -0.3844***<br>(-4.36) | -0.0649***<br>(-5.87) | -0.4029***<br>(-4.57) |
| Control variables                                               | Yes                   |
| State * Quarter FE                                              | Yes                   |
| Bank FE                                                         | Yes                   |
| Observations                                                    | 179,563               | 25,494                | 179,563               | 25,494                | 179,563               | 25,494                | 179,563               | 25,494                |
| $R^2$                                                           | 0.2195                | 0.3113                | 0.2228                | 0.3144                | 0.2248                | 0.3146                | 0.2242                | 0.3140                |
| Chow test $F$ -statistic                                        | 19.98                 |                       | 7.53                  |                       | 12.52                 |                       | 16.41                 |                       |
| $p$ -value                                                      | 0.00                  |                       | 0.02                  |                       | 0.00                  |                       | 0.00                  |                       |
| <b>Panel B: S&amp;L crisis</b>                                  |                       |                       |                       |                       |                       |                       |                       |                       |
| Dependent variable                                              | (1)<br>$EO^1$         | (2)<br>$EO^2$         | (3)<br>$EO^3$         | (4)<br>$EO^4$         |                       |                       |                       |                       |
| TG                                                              | -0.0058<br>(-0.18)    | -0.0009<br>(-0.03)    | -0.0029<br>(-0.08)    | -0.0036<br>(-0.10)    |                       |                       |                       |                       |
| TG * Post                                                       | -0.0639***<br>(-3.39) | -0.0663***<br>(-3.43) | -0.0650***<br>(-3.37) | -0.0654***<br>(-3.40) |                       |                       |                       |                       |
| TG * S&L crisis                                                 | -0.0039<br>(-0.05)    | -0.0101<br>(-0.11)    | -0.0089<br>(-0.11)    | -0.0137<br>(-0.16)    |                       |                       |                       |                       |
| Control variables                                               | Yes                   | Yes                   | Yes                   | Yes                   |                       |                       |                       |                       |
| State * Quarter FE                                              | Yes                   | Yes                   | Yes                   | Yes                   |                       |                       |                       |                       |
| Bank FE                                                         | Yes                   | Yes                   | Yes                   | Yes                   |                       |                       |                       |                       |
| Observations                                                    | 205,057               | 205,057               | 205,057               | 205,057               |                       |                       |                       |                       |
| $R^2$                                                           | 0.2217                | 0.2247                | 0.2265                | 0.2259                |                       |                       |                       |                       |

*Notes:* This table reports estimates of equation (6) using the earnings opacity measures  $EO^1$ - $EO^4$  as the dependent variable. The control variables are LLP<sub>t-1</sub>, Bank size, Capital ratio, and the Loss dummy. Panel A focuses on the regional banking crises in New England and in Texas. The sample includes observations from Connecticut, Maine, New Hampshire, Rhode Island and Texas. We classify the observations for banks in Connecticut, Maine, New Hampshire, and Rhode Island for the period 1991Q1–1993Q3 as crisis episodes to reflect the New England banking crisis. To consider the Texas banking crisis, we classify observations from Texas for the period 1986Q1–1988Q4 as a crisis. Panel B focuses on the S&L crisis. As most states were affected by the S&L crisis, there are few observations of non crisis periods. We therefore interact the TG dummy with the S&L crisis variable to identify whether state-chartered banks were differentially affected by the S&L crisis. Definitions of the variables are provided in Panel A of Table 2. The Chow test  $F$ -statistic in Panel A tests for equality between the coefficients in the models split into non crisis and crisis periods. The  $p$ -value is the  $p$ -value on the Chow test  $F$ -statistic. Standard errors are clustered at the state level and the corresponding heteroscedasticity-robust  $t$ -statistics are reported in parentheses. \*\*\* indicates statistical significance at the 1 percent level.

**Table B.5**  
**Failure Model**

| Dependent variable | (1)<br>Failure dummy |
|--------------------|----------------------|
| Bank size          | -0.0003<br>(-1.17)   |
| Capital ratio      | -0.0002*<br>(-1.92)  |
| NPA                | 0.0021<br>(0.60)     |
| Cost income ratio  | -0.0001<br>(-1.01)   |
| Cash               | 0.0001<br>(1.10)     |
| State * Quarter FE | Yes                  |
| Bank FE            | Yes                  |
| Observations       | 205,057              |
| $R^2$              | 0.0448               |

*Notes:* We report estimates of the equation  $fail_{bst} = \gamma_b + \beta_1 Bank\ size_{bst} + \beta_2 Capital\ ratio_{bst} + \beta_3 NPA_{bst} + \beta_4 Cost\ Income\ Ratio_{bst} + \beta_5 Cash_{bst} + \gamma_{st} + \varepsilon_{bst}$ , where  $fail_{bst}$  is a dummy variable equal to 1 if bank  $b$  in state  $s$  fails at time  $t$ , 0 otherwise; Bank size, Capital ratio, NPA, Cost Income Ratio, and Cash denote bank size, the capital ratio, the nonperforming loans ratio, the cost income ratio, and cash for bank  $b$  in state  $s$  at time  $t$ ;  $\gamma_b$  and  $\gamma_{st}$  denote bank and state-quarter-fixed effects, respectively;  $\varepsilon_{bst}$  is the error term. \* indicates statistical significance at the 10 percent level.

**Table B.6**  
**Further sensitivity checks: Geographical diversification, macroeconomic shocks, and regulators**

| <b>Panel A: Geographical diversification</b> |                               |                               |                               |                               |
|----------------------------------------------|-------------------------------|-------------------------------|-------------------------------|-------------------------------|
| Dependent variable                           | (1)<br><i>EO</i> <sup>1</sup> | (2)<br><i>EO</i> <sup>2</sup> | (3)<br><i>EO</i> <sup>3</sup> | (4)<br><i>EO</i> <sup>4</sup> |
| TG                                           | 0.0384<br>(1.22)              | 0.0356<br>(1.14)              | 0.0345<br>(1.11)              | 0.0357<br>(1.15)              |
| TG * Post                                    | -0.0610***<br>(-3.49)         | -0.0644***<br>(-3.50)         | -0.0631***<br>(-3.51)         | -0.0633***<br>(-3.51)         |
| TG * Number of counties                      | -0.0354***<br>(-3.24)         | -0.0289**<br>(-2.24)          | -0.0296*<br>(-2.11)           | -0.0313**<br>(-2.16)          |
| Control variables                            | Yes                           | Yes                           | Yes                           | Yes                           |
| State * Quarter FE                           | Yes                           | Yes                           | Yes                           | Yes                           |
| Bank FE                                      | Yes                           | Yes                           | Yes                           | Yes                           |
| Observations                                 | 205,057                       | 205,057                       | 205,057                       | 205,057                       |
| <i>R</i> <sup>2</sup>                        | 0.2218                        | 0.2249                        | 0.2266                        | 0.2261                        |
| <b>Panel B: Macroeconomic shocks</b>         |                               |                               |                               |                               |
| Dependent variable                           | <i>EO</i> <sup>1</sup>        | <i>EO</i> <sup>2</sup>        | <i>EO</i> <sup>3</sup>        | <i>EO</i> <sup>4</sup>        |
| TG                                           | -0.0510<br>(-0.67)            | -0.0526<br>(-0.71)            | -0.0521<br>(-0.69)            | -0.0524<br>(-0.68)            |
| TG * Post                                    | -0.0641***<br>(-3.74)         | -0.0666***<br>(-3.75)         | -0.0654***<br>(-3.70)         | -0.0659***<br>(-3.73)         |
| TG * UNEMP                                   | 0.0071<br>(0.71)              | 0.0081<br>(0.86)              | 0.0077<br>(0.79)              | 0.0077<br>(0.77)              |
| Control variables                            | Yes                           | Yes                           | Yes                           | Yes                           |
| State * Quarter FE                           | Yes                           | Yes                           | Yes                           | Yes                           |
| Bank FE                                      | Yes                           | Yes                           | Yes                           | Yes                           |
| Observations                                 | 205,057                       | 205,057                       | 205,057                       | 205,057                       |
| <i>R</i> <sup>2</sup>                        | 0.2217                        | 0.2248                        | 0.2265                        | 0.2259                        |
| <b>Panel C: Regulatory agency</b>            |                               |                               |                               |                               |
| Dependent variable                           | <i>EO</i> <sup>1</sup>        | <i>EO</i> <sup>2</sup>        | <i>EO</i> <sup>3</sup>        | <i>EO</i> <sup>4</sup>        |
| TG                                           | 0.0143<br>(0.48)              | 0.0194<br>(0.61)              | 0.0173<br>(0.55)              | 0.0165<br>(0.54)              |
| TG * Post                                    | -0.0642***<br>(-3.68)         | -0.0668***<br>(-3.68)         | -0.0655***<br>(-3.68)         | -0.0660***<br>(-3.70)         |
| TG * FDIC                                    | -0.1712*<br>(-2.01)           | -0.1727*<br>(-1.95)           | -0.1713*<br>(-1.91)           | -0.1710*<br>(-1.94)           |
| Control variables                            | Yes                           | Yes                           | Yes                           | Yes                           |
| State * Quarter FE                           | Yes                           | Yes                           | Yes                           | Yes                           |
| Bank FE                                      | Yes                           | Yes                           | Yes                           | Yes                           |
| Observations                                 | 205,057                       | 205,057                       | 205,057                       | 205,057                       |
| <i>R</i> <sup>2</sup>                        | 0.2217                        | 0.2248                        | 0.2265                        | 0.2259                        |

*Notes:* We report estimates of equation (6) using the earnings opacity measures *EO*<sup>1</sup>-*EO*<sup>4</sup> as dependent variables. Panel A includes an interaction term between the treatment group dummy and the number of counties a bank operates in. Panel B includes an interaction term between the treatment group dummy and the state unemployment rate. Panel C includes an interaction term between the treatment group dummy and an FDIC dummy. The control variables are LLP<sub>*t-1*</sub>, Bank size, Capital ratio, and the Loss dummy. The sample is restricted to banks in states that enacted depositor preference over the period 1983Q1 to 1993Q2. Standard errors are clustered at the state level, and the corresponding heteroscedasticity-robust *t*-statistics are reported in parentheses. \*\*\*, \*\* and \* indicate statistical significance at the 1, 5 and 10 percent levels, respectively.



**Table B.7**  
**Alternative control group: Matched Sample**

| Dependent variable               | (1)<br><i>EO</i> <sup>1</sup> | (2)<br><i>EO</i> <sup>2</sup> | (3)<br><i>EO</i> <sup>3</sup> | (4)<br><i>EO</i> <sup>4</sup> |
|----------------------------------|-------------------------------|-------------------------------|-------------------------------|-------------------------------|
| TG                               | 0.0105<br>(0.11)              | 0.0104<br>(0.11)              | 0.0116<br>(0.12)              | 0.0120<br>(0.13)              |
| TG * Post                        | -0.1325***<br>(-4.18)         | -0.1312***<br>(-4.16)         | -0.1317***<br>(-4.15)         | -0.1322***<br>(-4.16)         |
| <i>LLP</i> <sub><i>t</i>-1</sub> | 1.3024***<br>(5.09)           | 1.3728***<br>(5.33)           | 1.3709***<br>(5.04)           | 1.3450***<br>(4.92)           |
| Bank size                        | -0.0916<br>(-1.41)            | -0.1022<br>(-1.56)            | -0.1094<br>(-1.66)            | -0.1067<br>(-1.63)            |
| Capital ratio                    | -0.1089***<br>(-3.81)         | -0.1084***<br>(-3.80)         | -0.1085***<br>(-3.78)         | -0.1087***<br>(-3.80)         |
| Loss                             | 0.6978***<br>(20.35)          | 0.6943***<br>(20.65)          | 0.6937***<br>(20.72)          | 0.6947***<br>(20.61)          |
| State * Quarter FE               | Yes                           | Yes                           | Yes                           | Yes                           |
| Bank FE                          | Yes                           | Yes                           | Yes                           | Yes                           |
| Observations                     | 77,269                        | 77,269                        | 77,269                        | 77,269                        |
| <i>R</i> <sup>2</sup>            | 0.1828                        | 0.1863                        | 0.1879                        | 0.1874                        |

*Notes:* We report estimates of equation (6) based on a 1:1 nearest neighbor propensity matching strategy using the earnings opacity measures *EO*<sup>1</sup>-*EO*<sup>4</sup> as dependent variables. Our matched sample pairs one state-chartered bank with one propensity-score matched nationally-chartered bank, resulting in a sample with 77,269 observations. The sample is restricted to banks in states that enacted depositor preference over the period 1983Q1 to 1993Q2. Standard errors are clustered at the state level, and the corresponding heteroscedasticity-robust *t*-statistics are reported in parentheses. \*\*\* indicates statistical significance at the 1 percent level.

**Table B.8**  
**Tests for anticipation effects and alternative treatment of standard errors**

| <b>Panel A: Anticipation effects</b>                        |                       |                       |                       |                       |
|-------------------------------------------------------------|-----------------------|-----------------------|-----------------------|-----------------------|
| Dependent variable                                          | (1)<br>$EO^1$         | (2)<br>$EO^2$         | (3)<br>$EO^3$         | (4)<br>$EO^4$         |
| TG                                                          | -0.0007<br>(-0.02)    | 0.0030<br>(0.08)      | 0.0004<br>(0.01)      | 0.0002<br>(0.01)      |
| TG * Post                                                   | -0.0700***<br>(-3.43) | -0.0712***<br>(-3.33) | -0.0692***<br>(-3.33) | -0.0703***<br>(-3.35) |
| TG * Placebo <sub>t-1</sub>                                 | -0.0257<br>(-0.92)    | -0.0203<br>(-0.79)    | -0.0184<br>(-0.72)    | -0.0193<br>(-0.75)    |
| TG * Placebo <sub>t-2</sub>                                 | 0.0165<br>(0.65)      | 0.0188<br>(0.79)      | 0.0182<br>(0.69)      | 0.0157<br>(0.60)      |
| TG * Placebo <sub>t-3</sub>                                 | -0.0449<br>(-0.82)    | -0.0379<br>(-0.69)    | -0.0345<br>(-0.63)    | -0.0379<br>(-0.69)    |
| TG * Placebo <sub>t-4</sub>                                 | -0.0121<br>(-0.45)    | -0.0115<br>(-0.41)    | -0.0079<br>(-0.27)    | -0.0088<br>(-0.31)    |
| Control variables                                           | Yes                   | Yes                   | Yes                   | Yes                   |
| State * Quarter FE                                          | Yes                   | Yes                   | Yes                   | Yes                   |
| Bank FE                                                     | Yes                   | Yes                   | Yes                   | Yes                   |
| Observations                                                | 205,057               | 205,057               | 205,057               | 205,057               |
| $R^2$                                                       | 0.2217                | 0.2248                | 0.2265                | 0.2259                |
| <b>Panel B: Bertrand et al. (2004) collapsing technique</b> |                       |                       |                       |                       |
| Dependent variable                                          | $EO^1$                | $EO^2$                | $EO^3$                | $EO^4$                |
| TG                                                          | -0.0956<br>(-1.47)    | -0.0863<br>(-1.33)    | -0.0860<br>(-1.32)    | -0.0893<br>(-1.38)    |
| TG * Post                                                   | -0.0974***<br>(-6.21) | -0.1004***<br>(-6.40) | -0.0995***<br>(-6.33) | -0.0991***<br>(-6.32) |
| Controls                                                    | Yes                   | Yes                   | Yes                   | Yes                   |
| State * Period FE                                           | Yes                   | Yes                   | Yes                   | Yes                   |
| Bank FE                                                     | Yes                   | Yes                   | Yes                   | Yes                   |
| Observations                                                | 11,048                | 11,048                | 11,048                | 11,048                |
| $R^2$                                                       | 0.7343                | 0.7378                | 0.7407                | 0.7403                |

*Notes:* We report estimates of equation (6) using the earnings opacity measures  $EO^1$ - $EO^4$  as dependent variables. Panel A examines anticipation effects by including placebo dummies at  $t-1$ ,  $t-2$ ,  $t-3$ , and  $t-4$  interacted with the treatment group dummy. Panel B uses the collapsing technique described in Bertrand et al. (2004) to mitigate concerns about serial correlation in panels. The data in Panel B contain a before and after period for each bank and we therefore generate period dummy variables, interacted with the state-fixed effects to mirror the state\*quarter-fixed effects. The control variables are  $LLP_{t-1}$ , Bank size, Capital ratio, and the Loss dummy. The sample is restricted to banks in states that enacted depositor preference over the period 1983Q1 to 1993Q2. Standard errors are clustered at the state level, except for Panel B, and the corresponding heteroscedasticity-robust  $t$ -statistics are reported in parentheses. \*\*\* indicates statistical significance at the 1 percent level.
